# Supplementary material for: A dumbbell-like A–D–A molecule for single-component organic solar cells
Source: Royal Society of Chemistry journal article supplement (doi:10.1039/c3cp54642j), 2013-11-27
Supplement: c3cp54642j.pdf [file c3cp54642j.pdf]

## Supporting Information

### **A dumbbell-like A-D-A molecule for single-component organic solar cells**

Jiamin Cao, Xiaoyan Du, Shan Chen, Zuo Xiao\* and Liming Ding\*

*National Center for Nanoscience and Technology, Beijing 100190, China; E-mail:  
opv.china@yahoo.com, xiaoz@nanoctr.cn*

- 1. General characterization**
- 2. Device fabrication and measurements**
- 3. Synthetic procedures and spectral data**
- 4. NMR spectra**
- 5. Mass spectrum**
- 6. TGA**
- 7. Space charge limited current (SCLC) measurements**
- 8. AFM**

## 1. General characterization

NMR spectra were measured with a Bruker Avance-400 spectrometer. MALDI-TOF mass spectrum was measured on an Autoflex III spectrometer. Absorption spectra were recorded on a Shimadzu UV-1800 spectrophotometer. Thermogravimetric analysis (TGA) was done by a Perkin-Elmer Diamond TG/DTA thermal analyzer. Cyclic voltammetry (CV) was conducted on a Shanghai Chenhua CHI620D voltammetric analyzer. All measurements were carried out in a one-compartment cell under Ar gas, equipped with a glassy-carbon working electrode, a platinum wire counter electrode, and a Ag/Ag<sup>+</sup> reference electrode. Measurements were performed in ODCB/CH<sub>3</sub>CN (9:1) solution containing tetrabutylammonium hexafluorophosphate (0.1 M) as a supporting electrolyte at 25 °C (scan rate 0.1 V/s). All potentials were corrected against Fc/Fc<sup>+</sup>. AFM was done on a Dimension 3100 microscope (Veeco).

## 2. Device fabrication and measurements

### Solar cells

Patterned ITO glass with a sheet resistance of 15  $\Omega$  sq<sup>-1</sup> was ultrasonically cleaned using detergent, distilled water, acetone, isopropanol sequentially and then given UV-ozone treatment. A 30 nm thick poly(3,4-ethylenedioxythiophene)/polystyrene sulfonate (PEDOT:PSS, Clevios™ P VP Al 4083) layer was formed on ITO substrates by spin coating an aqueous dispersion onto ITO glass (4000 rpm for 30 s). PEDOT:PSS coated substrates were dried at 140 °C for 10 min. Triad **1** in chlorobenzene (15 mg/mL) was spin-coated onto PEDOT:PSS layer (1000 rpm for 60 s). Then the films were annealed at 110 °C for 10 min. Finally, Ca (~10 nm) and Al (~100 nm) were thermally evaporated under a shadow mask (pressure ca. 10<sup>-4</sup> Pa). The effective area for the devices is 4 mm<sup>2</sup>. *J-V* curves were measured with a computerized Keithley 2420 SourceMeter. Device characterization was done in air using a Xenon-lamp-based solar simulator (Newport, 91159A, AM 1.5G, 100 mW/cm<sup>2</sup>). Solar simulator illumination intensity was determined using a

monocrystalline silicon cell (Oriel 91150,  $2 \times 2$  cm) calibrated by NREL. The external quantum efficiency (EQE) and internal quantum efficiency (IQE) spectra were measured using a QE-R3011 measurement system (Enli Technology, Inc.). The thicknesses of the active layers (~60 nm) were measured by a KLA Tencor D-120 profilometer.

### Electron-only devices

The structure for electron-only devices is Al/active layer/Ca/Al. Al (~80 nm) was firstly evaporated onto a glass substrate. Triad **1** in chlorobenzene (15 mg/mL) was spin-coated onto Al (1000 rpm for 60 s). Then the films were annealed at 110 °C for 10 min. Ca (~5 nm) and Al (~100 nm) were thermally evaporated under a shadow mask (pressure ca.  $10^{-4}$  Pa). *J-V* curves were measured using a computerized Keithley 2420 SourceMeter in the dark.

### Hole-only devices

The structure for hole-only devices is ITO/PEDOT:PSS/active layer/MoO<sub>3</sub>/Al. A 30 nm thick PEDOT:PSS layer was formed on ITO substrates by spin coating an aqueous dispersion onto ITO glass (4000 rpm for 30 s). PEDOT:PSS coated substrates were dried at 140 °C for 10 min. Triad **1** in chlorobenzene (15 mg/mL) was spin-coated onto PEDOT:PSS layer (1000 rpm for 60 s). Then the films were annealed at 110 °C for 10 min. Finally, MoO<sub>3</sub> (~5 nm) and Al (~100 nm) were thermally evaporated under a shadow mask (pressure ca.  $10^{-4}$  Pa). *J-V* curves were measured using a computerized Keithley 2420 SourceMeter in the dark.

## 3. Synthetic procedures and spectral data

All reagents were purchased from Alfa Aesar Co., Aladdin Co., Acros Co. and other commercial suppliers. All reactions dealing with air- or moisture-sensitive compounds were carried out using standard Schlenk techniques. 4,7-Dibromo-2,1,3-benzothiadiazole and

2,6-bis(trimethylstannyl)-4,4-bis(2-ethylhexyl)-dithieno[3,2-b:2',3'-d]silole (DTS) were synthesized according to literatures.<sup>1-2</sup>

**4-(7-Bromobenzo[*c*][1,2,5]thiadiazol-4-yl)but-3-yn-1-ol (3).** To a solution of but-3-yn-1-ol (0.05 g, 0.71 mmol) and 4,7-dibromo-2,1,3-benzothiadiazole (0.21 g, 0.71 mmol) in toluene (50 mL) and triethylamine (35 mL) were added CuI (40 mg, 0.21 mmol) and Pd(PPh<sub>3</sub>)<sub>2</sub>Cl<sub>2</sub> (100 mg, 0.14 mmol) under argon. The mixture was stirred vigorously at 65 °C for 48 h, and then cooled to room temperature. After removal of the solvent, the crude product was purified through a silica gel column with dichloromethane to give a gray white solid (105 mg, 52%). <sup>1</sup>H NMR (400 MHz, CDCl<sub>3</sub>) δ (ppm): 7.79 (d, *J* = 7.6 Hz, 1H), 7.54 (d, *J* = 7.6 Hz, 1H), 3.92 (br, 2H), 2.84 (t, *J* = 6.1 Hz, 2H), 2.20 (br, 1H). <sup>13</sup>C NMR (100 MHz, CDCl<sub>3</sub>) δ (ppm): 154.60, 152.95, 132.49, 131.88, 116.69, 114.34, 95.27, 77.98, 60.86, 24.30.

**4,4'-(7,7'-(4,4-Bis(2-ethylhexyl)-4H-silolo[3,2-*b*:4,5-*b'*])dithiophene-2,6-diyl)bis(benzo[*c*][1,2,5]thiadiazole-7,4-diyl))bis(but-3-yn-1-ol) (2).** To a solution of compound **3** (0.29 g, 1.0 mmol) and DTS (0.37 g, 0.5 mmol) in toluene (50 mL) was added Pd(PPh<sub>3</sub>)<sub>4</sub> (60 mg, 0.05 mmol) under argon. The mixture was heated to reflux for 24 h, and then cooled to room temperature. After removal of the solvent, the crude product was purified through a silica gel column with dichloromethane/ethyl acetate (1:1) to give a purple solid (128 mg, 31%). <sup>1</sup>H NMR (400 MHz, CDCl<sub>3</sub>) δ (ppm): 8.23 (t, *J* = 3.4 Hz, 2H), 7.51 (d, *J* = 7.3 Hz, 2H), 7.41 (d, *J* = 7.1 Hz, 2H), 3.98 (t, *J* = 5.8 Hz, 4H), 2.89 (t, *J* = 5.8 Hz, 4H), 2.48 (br, 2H), 1.62-1.57 (m, 2H), 1.43-1.07 (m, 20H), 0.89-0.84 (m, 12H). <sup>13</sup>C NMR (100 MHz, CDCl<sub>3</sub>) δ (ppm): 155.19, 150.99, 150.61, 145.14, 141.11, 132.13, 131.57, 127.28, 123.57, 113.90, 95.18, 78.73, 60.94, 36.11, 35.83, 29.08, 28.98, 24.65, 23.11, 17.84, 14.24, 10.89. MALDI-TOF-MS (+) for C<sub>44</sub>H<sub>50</sub>N<sub>4</sub>O<sub>2</sub>S<sub>4</sub>Si [M<sup>+</sup>]: 822.8.

**Triad 1.** A solution of compound **2** (75 mg, 0.09 mmol) and PCBA (179 mg, 0.2 mmol) in dichlorobenzene (20 mL) was sonicated for 1 h. After being cooled to 0 °C,

N,N'-dicyclohexylcarbodiimide (DCC) (150 mg, 0.72 mmol) and 4-dimethylaminopyridine (DMAP) (100 mg, 0.72 mmol) were added. The mixture was stirred at 25 °C overnight. After removal of the solvent, the crude product was purified through a silica gel column with dichloromethane to give a purple solid (125 mg, 53%). <sup>1</sup>H NMR (400 MHz, CDCl<sub>3</sub>) δ (ppm): 8.17 (m, *J* = 5.1 Hz, 2H), 7.90 (d, *J* = 7.3 Hz, 4H), 7.75 (d, *J* = 7.5 Hz, 2H), 7.70 (d, *J* = 7.5 Hz, 2H), 7.53 (t, *J* = 7.4 Hz, 4H), 7.46 (t, *J* = 7.3 Hz, 2H), 4.39 (t, *J* = 6.4 Hz, 4H), 2.97-2.91 (m, 8H), 2.61 (t, *J* = 7.2 Hz, 4H), 2.26-2.19 (m, 4H), 1.54-1.49 (m, 2H), 1.36-1.02 (m, 20H), 0.82-0.79 (m, 12H). <sup>13</sup>C NMR (100 MHz, CDCl<sub>3</sub>) δ (ppm): 172.76, 155.51, 151.65, 150.78, 148.67, 147.63, 145.63, 145.17, 145.10, 145.06, 144.95, 144.89, 144.70, 144.58, 144.41, 144.31, 143.92, 143.67, 143.02, 142.90, 142.84, 142.80, 142.10, 142.08, 142.04, 142.02, 140.86, 140.79, 140.64, 137.92, 137.48, 136.69, 133.24, 132.05, 131.43, 128.40, 128.22, 127.95, 124.22, 114.52, 93.15, 79.81, 78.52, 62.13, 51.82, 36.01, 35.78, 34.10, 33.59, 29.00, 28.94, 23.07, 22.43, 20.64, 17.71, 14.25, 10.88. MALDI-TOF-MS (+) for C<sub>186</sub>H<sub>70</sub>N<sub>4</sub>O<sub>4</sub>S<sub>4</sub>Si [M<sup>+</sup>]: 2580.7.

#### 4. NMR spectra

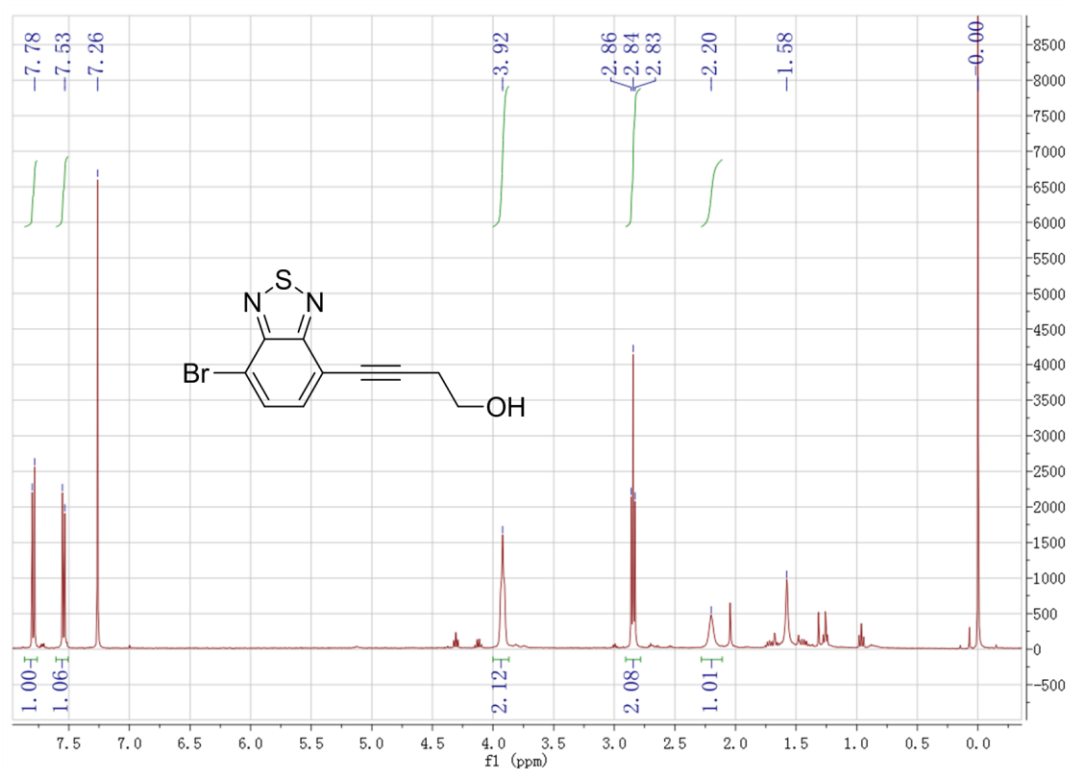

**Fig. S1** <sup>1</sup>H NMR spectrum of compound **3**.

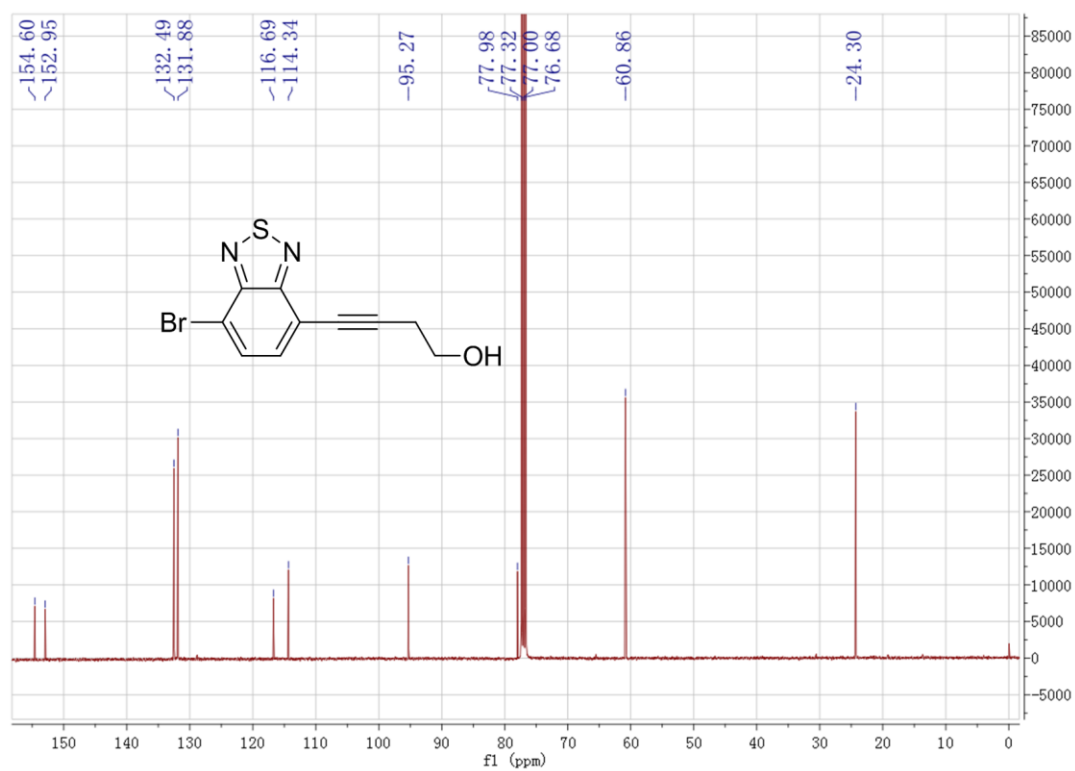

**Fig. S2** <sup>13</sup>C NMR spectrum of compound **3**.

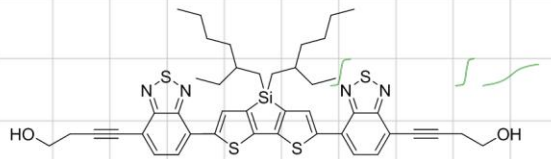

**Fig. S3**  $^1\text{H}$  NMR spectrum of compound **2**.

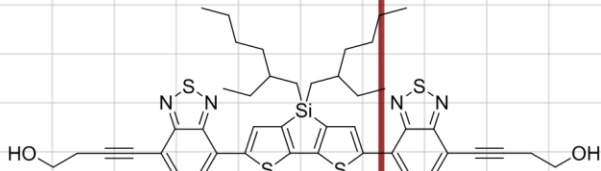

**Fig. S4**  $^{13}\text{C}$  NMR spectrum of compound **2**.

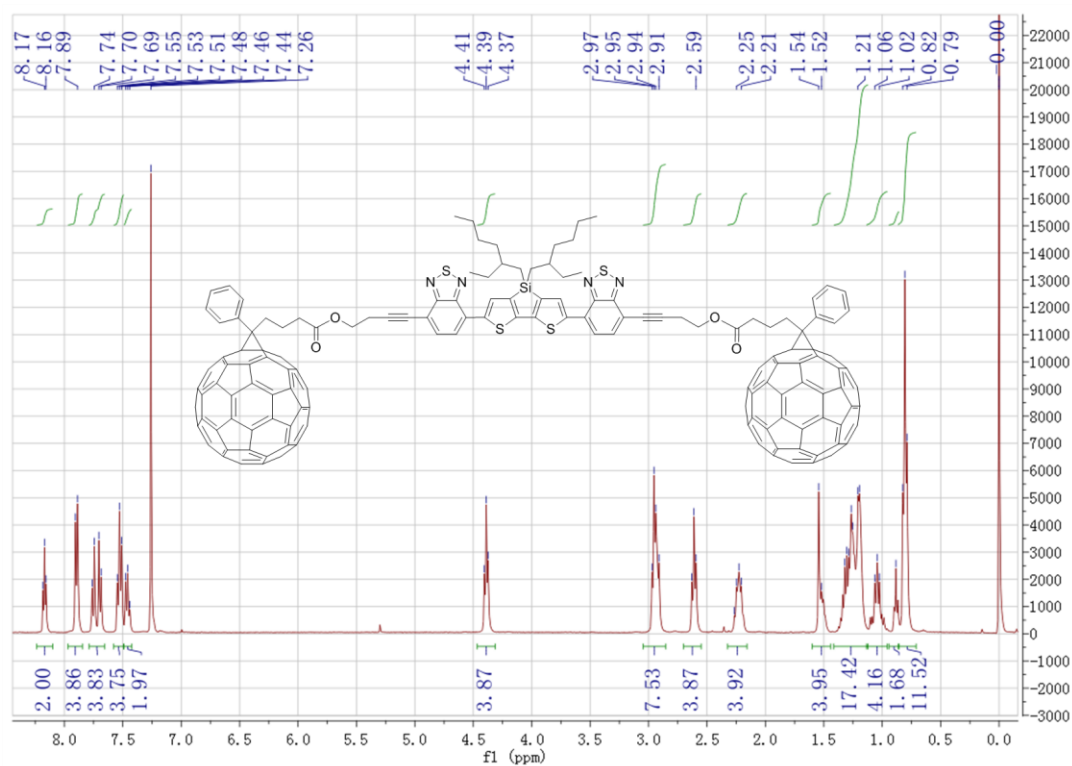

**Fig. S5** <sup>1</sup>H NMR spectrum of triad **1**.

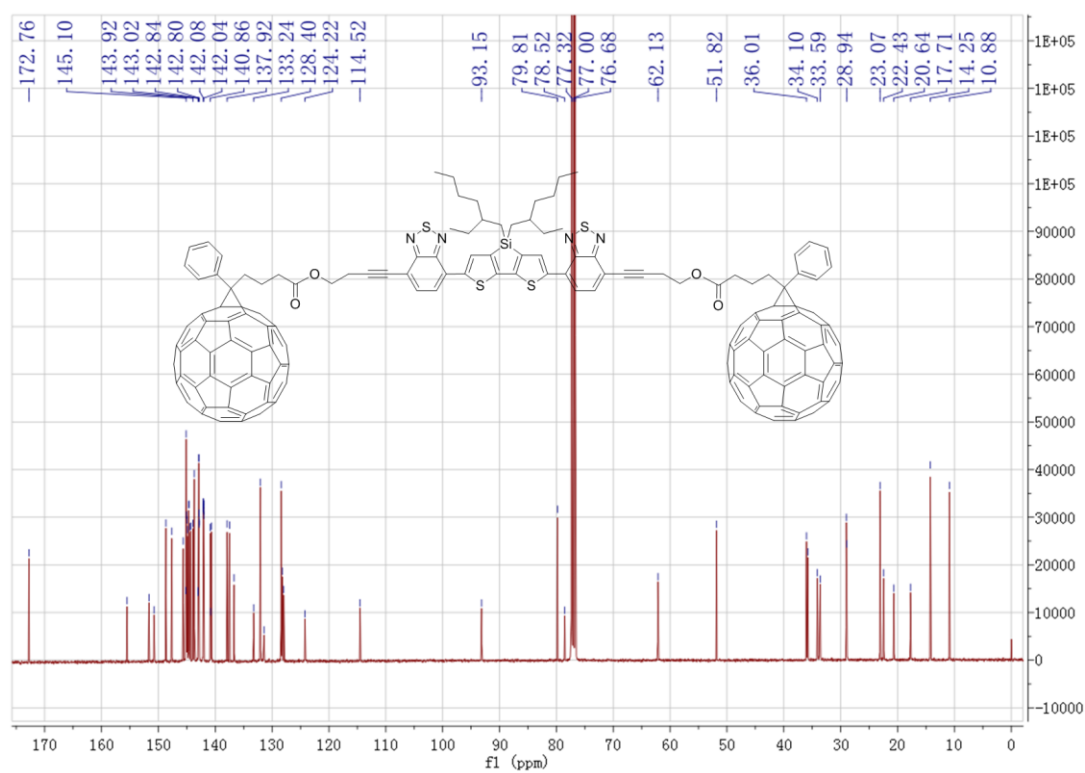

**Fig. S6** <sup>13</sup>C NMR spectrum of triad **1**.

## 5. Mass spectrum

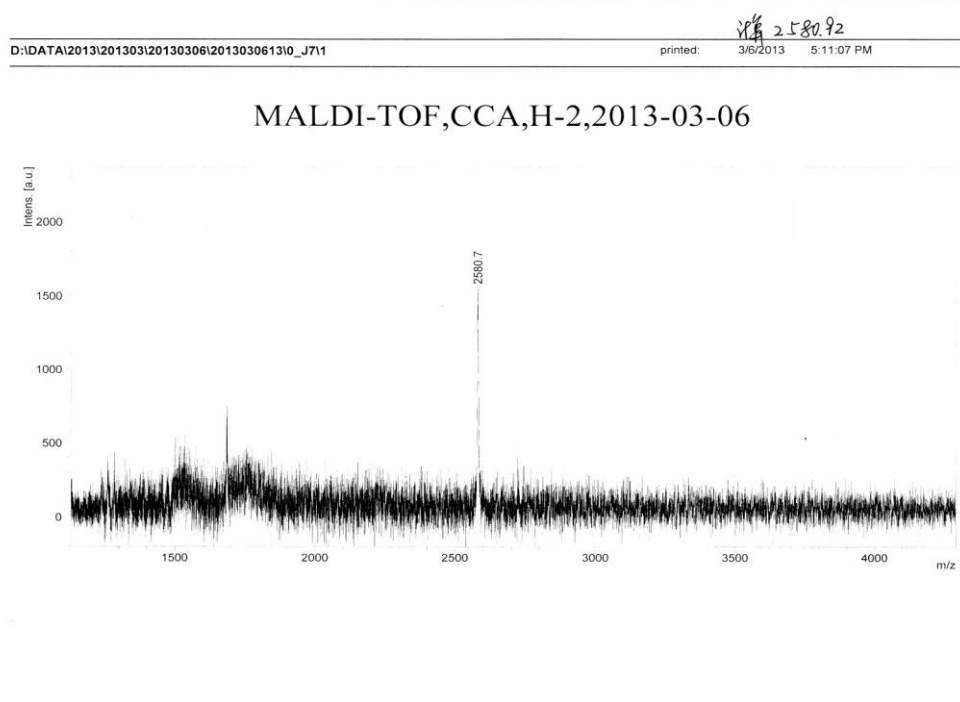

**Fig. S7** Mass spectrum of triad **1**.

## 6. TGA

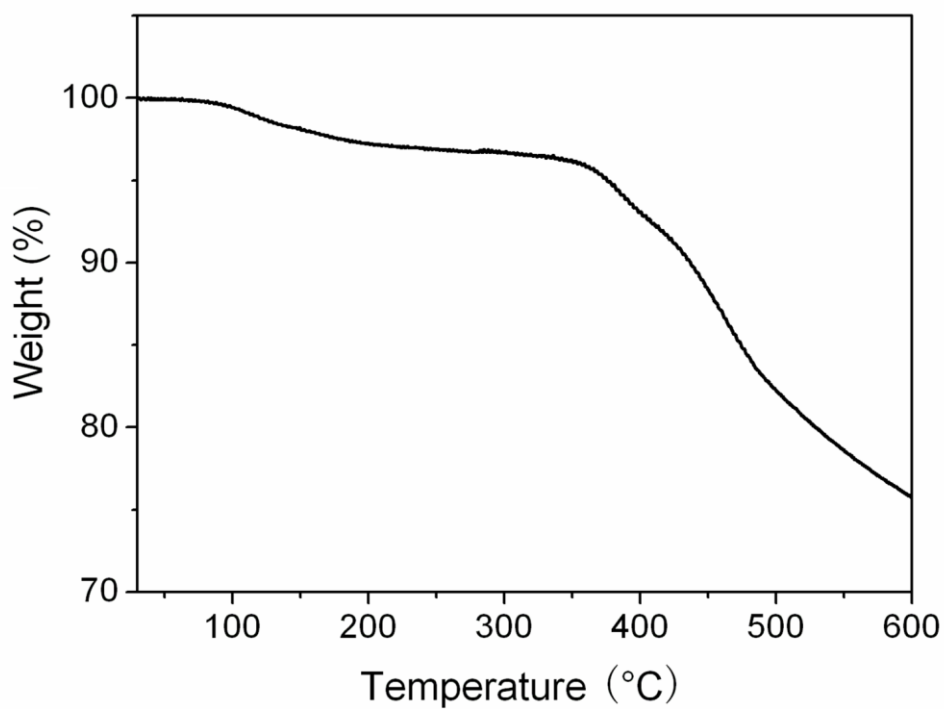

**Fig. S8** TGA curve of triad **1**.

## 7. Space charge limited current (SCLC) measurements

The charge carrier mobility was measured by SCLC method. The mobility was determined by fitting the dark current to the model of a single carrier SCLC, which is described by:

$$J = \frac{9}{8} \varepsilon_0 \varepsilon_r \mu \frac{V^2}{d^3}$$

where  $J$  is the current density,  $\mu$  is the zero-field mobility for electrons ( $\mu_e$ ) or holes ( $\mu_h$ ),  $\varepsilon_0$  is the permittivity of the vacuum,  $\varepsilon_r$  is the relative permittivity of the material,  $d$  is the film thickness, and  $V$  is the effective voltage,  $V = V_{\text{appl}} - V_{\text{bi}}$ , where  $V_{\text{appl}}$  is the applied voltage, and  $V_{\text{bi}}$  is the built-in potential which results from workfunction difference for anode and cathode. Figure S9 (a) shows  $J$ - $V$  curves of the electron-only and hole-only devices. The mobility was calculated from the slope of  $J^{1/2}$ - $V$  curves.

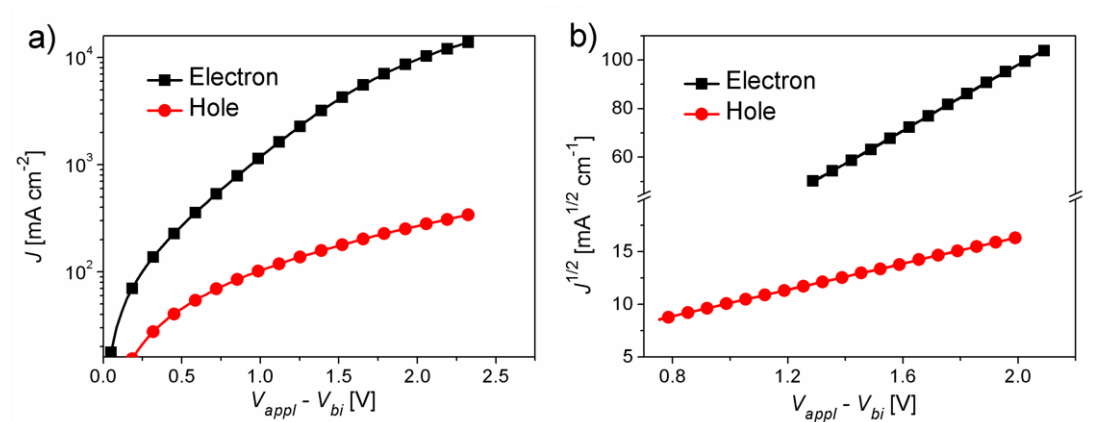

**Fig. S9**  $J$ - $V$  curves (a) and the corresponding  $J^{1/2}$ - $V$  curves (b) for electron-only or hole-only devices (in dark). The thicknesses of the films are 60 nm and 65 nm, respectively.

## 8. AFM

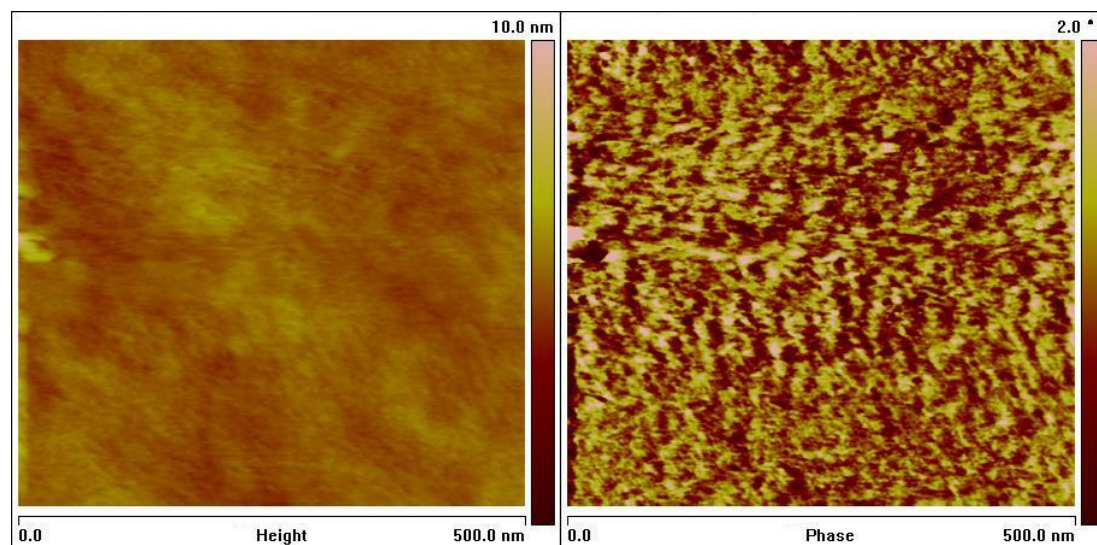

**Fig. S10** AFM images for triad **1** film.

## References

- [1] J. Hou, M.-H. Park, S. Zhang, Y. Yao, L.-M. Chen, J.-H. Li and Y. Yang, *Macromolecules*, 2008, **41**, 6012.
- [2] J. Cao, W. Zhang, Z. Xiao, L. Liao, W. Zhu, Q. Zuo and L. Ding, *Macromolecules*, 2012, **45**, 1710.
